1 **Full title: Preparation and characterization of phospholipid stabilized**  
2 **nanoemulsions in small-scale**

3 **Short title: Phospholipid stabilized Nanoemulsions in small-scale**

4 **Shila Gurung<sup>a, b\*</sup>, Martin Holzer<sup>a</sup>, Sabine Barnert<sup>a</sup>, Rolf Schubert<sup>a</sup>**

5 <sup>a</sup>Department of Pharmaceutical Technology and Biopharmacy, Albert Ludwig University of Freiburg,  
6 Freiburg im Breisgau, Germany

7 <sup>b</sup>Current address: [School of Health and Allied Sciences, Pokhara University, Kaski, Nepal](#)

8 [\\*gshila@gmail.com](mailto:*gshila@gmail.com) (SG)

## 9 **Abstract**

10 Phospholipids have been used to prepare liposomes. The use of phospholipids to stabilize  
11 nanoemulsions may cause spontaneous formation of liposomes. The main objective of this study is to  
12 develop a method to prepare phospholipid stabilized nanoemulsions in small scale (< 1 mL) and to  
13 minimize the formation of liposomes.

14 A combination of hand extrusion and detergent removal methods was used in this study. Extrusion  
15 through polycarbonate membranes was performed in two steps, firstly using membranes of 400 nm  
16 followed by 200 nm membranes as the second step. Sodium cholate was used as a detergent to  
17 solubilize the formed liposomes which was later removed via dialysis. Nanoemulsions were characterized  
18 by measuring their particle size, polydispersity index and zeta-potential using Photon Correlation  
19 Spectroscopy and Cryo-TEM pictures. The stability of nanoemulsion stored under refrigeration was also  
20 studied.

21 Fifty-one extrusion cycles through polycarbonate membrane of 400 nm pore size followed by one-  
22 hundred fifty-three cycles through polycarbonate membrane of 200 nm produced nanoemulsions having  
23 particle size below 200 nm (diameter). The nanoemulsions were found to be homogenous as depicted by  
24 polydispersity index (PDI) value below 0.1. Similarly, the zeta-potential was measured to be above -30  
25 mV which is sufficient to keep nanoemulsions stable for as long as 7 months when stored under  
26 refrigeration. The Cryo-TEM pictures revealed 30 mM to be an optimum concentration of sodium cholate  
27 to prepare homogenous nanoemulsions with negligible proportion of liposomes.

28 It was concluded that this method could be established as a small scale method of preparing  
29 nanoemulsions which will not only reduce the cost of preparation but also the disposal cost of toxic  
30 chemicals used for functionalizing nanoemulsions for scientific research.

31

32 **Keywords:** Small-scale nanoemulsions, Functionalized nanoemulsions, Phospholipids, Photon  
33 Correlation Spectroscopy, Hand extrusion

## 34 **Introduction**

35 Nanoemulsions are transparent or translucent systems generally covering a size range between 20-500  
36 nm. Due to the small droplet size, the Brownian motion is sufficiently high to overcome the phenomena of  
37 physical destabilization caused by gravitational separation, flocculation and/or coalescence [1-4]. When  
38 the maximum droplet size of an emulsion is below 80 nm, it gains advanced properties compared to  
39 conventional emulsions, such as optical transparency, high colloidal stability and large interfacial area to  
40 volume ratio [5]. Nanoemulsions differ from microemulsions with respect to stability, preparation methods,  
41 dilution behavior and temperature fluctuations. In addition, nanoemulsions are thermodynamically  
42 unstable, but kinetically stable systems and require less surfactant than microemulsions. They are  
43 sometimes referred to as 'approaching thermodynamic stability [5, 6].

44 Nanoemulsions have been extensively investigated as a promising drug delivery system for poorly water  
45 soluble substances. They have been used in intravenous, oral and ocular drug administrations to reduce  
46 drug side effects and improve the pharmacological effects of the loaded drugs [3].

47 Parenteral emulsions provide a number of potential advantages as drug delivery vehicle, such as  
48 reduction in pain, irritation and thrombophlebitis, reduced toxicity, improved stability and solubility, and the  
49 option for a targeted drug delivery approach [7]. The droplets remain stable under the conditions of  
50 temperature changes and/or dilutions and do not differ markedly from bulk values. This is especially  
51 advantageous for nanoemulsions because when they are injected into the bloodstream, changes in  
52 temperature, pH values, osmolarity etc. are likely to occur, affecting the physical properties of the loaded  
53 drug [8, 9].

54 Emulsion formation is a non-spontaneous process and therefore requires high energy [5, 10]. The basic  
55 composition of an emulsion system is oil, water and emulsifier. For the oil phase, long chain triglycerides  
56 such as triolein, soybean oil, safflower oil, sesame oil, and castor oil are approved for clinical use.  
57 Medium chain triglycerides are used alone or in combination and the approved ones include fractionated

58 coconut oil, Miglyol® 810 and 812, Neobee®, and Captex® 300 [7]. Generally, the oil phase does not  
59 exceed 30% (w/w), due to which the application of emulsions in drug delivery is limited [11].

60 Emulsifier plays major role in the formation of nanoemulsions by lowering the interfacial tension and  
61 hence less stress is needed to break up a droplet [5, 12]. Depending upon the nature of the emulsifier  
62 used, they form an interfacial film at the o/w interface, which provides a mechanical barrier and repulsive  
63 force to stabilize the emulsion system. The repulsive forces provided by the emulsifiers can be  
64 electrostatic (e.g. lecithin), steric (e.g. block copolymer like Poloxamer 188) or electrosteric (a  
65 combination of both lecithin and block copolymers). Unfortunately, only a limited number of emulsifiers  
66 are approved and recognized as safe by the regulatory authorities [7, 13].

67 Most commonly used methods for preparing emulsions are simple pipe flow, static mixers and general  
68 stirrers, high speed mixers, colloid mills, high pressure homogenizers and ultrasonication. Other methods  
69 include the low energy emulsification method at constant temperature [4, 14] and the phase inversion  
70 temperature (PIT) [5, 15]. However, for preparing nanoemulsions, one is limited to the higher energy  
71 sources like high pressure homogenizer and ultrasonication [5, 16]. These so-called high energy methods  
72 supply enough energy to increase the interfacial area for generating submicronic droplets [8, 17].

73 Depending upon the preparation method, the size of nanoemulsions varies. Those prepared using PIT  
74 are relatively polydisperse and generally give higher Ostwald ripening rates than those prepared by high  
75 pressure homogenisation techniques [5]. By using ultrasonic devices having frequencies from 20 kHz to  
76 1.0 MHz droplets typically between 100 and 1000 nm in diameter can be prepared. Therefore, they are  
77 mostly milky in appearance. However, use of a higher frequency of 2.4 MHz, could produce clear and  
78 transparent emulsions which are stable for 12 months even under surfactant-free conditions [18]. The  
79 main disadvantages of these high energy methods are difficulties for small scale preparation and  
80 therefore expensive.

81 In this study, we investigated a method to prepare stable and homogenous nanoemulsions having definite  
82 size and narrow size distribution (PDI below 0.1) in a small scale. This method would be very useful and

83 cost effective in scientific research for the following reasons: a) for in vitro studies, very less volume of  
84 nanoemulsion (< 1 ml) is sufficient, b) to minimize the sample waste and disposal cost, c) to simplify the  
85 working set up by avoiding the use of compressed air (like in high pressure homogenizers), and d) to  
86 minimize the cost of preparation, especially when expensive chemicals like isotopes, fluorescence  
87 markers, nanoparticles surface modifiers like anchors and ligands or antibodies are used.

## 88 **Materials and Methods**

### 89 **Materials**

90 Medium chain triglyceride (Miglyol® 812) was obtained from Sasol GmbH, Witten, Germany. Egg  
91 phospholipid (Lipoid® E80) and Poloxamer 188 (Lutrol® F68) were generously gifted by Lipoid GmbH,  
92 Ludwigshafen, Germany and BASF, Ludwigshafen, Germany, respectively. Glycerol (purity >99 %) and  
93 sodium cholate hydrate were purchased from Sigma-Aldrich Life Science, Steinheim, Germany. Similarly  
94 cholic acid (2, 4-<sup>3</sup>H) was obtained from American Radiolabeled Chemicals, Inc. St. Louis, MO, USA and  
95 phosphatidylcholine (DPPC, L- $\alpha$ -dipalmitoyl [1-palmitoyl-1-<sup>14</sup>C] from PerkinElmer, Inc. Albany Street,  
96 Boston, USA. Deionized water (18.2 M $\Omega$ .cm) was used for all dilutions. Slide-A-Lyzer® (10 kDa  
97 membrane cut off) was commercially available from Thermo Scientific, Rockford, USA. All other  
98 chemicals were of analytical grade.

### 99 **Preparation of nanoemulsions**

#### 100 *Hand extruded nanoemulsions*

101 Crude emulsion was prepared by phase inversion temperature method. Briefly, the ingredients of  
102 aqueous phase (Table 1) were mixed in a round bottomed flask at 70 °C for about 30 min and 700 rpm  
103 using magnetic stirrer (MR 3001, Heidolph Instruments, Schwabach, Germany). Similarly, the oily phase  
104 was also prepared by mixing the ingredients (Table 1) in similar conditions. The aqueous phase was then  
105 added slowly to the oil phase upon constant stirring (700 rpm) but at an increased temperature of 80 °C.  
106 The mixture appeared apparently transparent in the beginning and then turned into translucent upon  
107 further addition of remaining aqueous phase. This translucent preparation was cooled for about 1 h in ice

108 bath and was termed as crude emulsion. The theoretical concentration of phospholipid was maintained at  
109 15.75 mM (1.2 %, w/w) throughout the study.

110 **Table 1. Composition of nanoemulsion**

| 111 | <b>Oil Phase</b>               | <b>Aqueous Phase</b>          |
|-----|--------------------------------|-------------------------------|
| 112 | Miglyol® (10 %, w/w)           | Poloxamer 188 (1.0 %, w/w)    |
| 113 | Phospholipid E80® (1.2 %, w/w) | Glycerol (2.5 %, w/w)         |
| 114 |                                | Deionized water (~ 86 %, w/w) |
| 115 |                                | Sodium cholate (20 – 50 mM)   |

116 Then the crude emulsion was extruded through polycarbonate membranes pre-equilibrated in deionized  
117 water for 15 – 30 min using a LiposoFast Basic device (Avestin Inc., Ottawa, Canada). The extrusion was  
118 done in two steps in a water bath at 65 °C. In the first step, the crude emulsion was extruded for 51 cycles  
119 (400 nm pore size) which was followed by additional 153 extrusion cycles (200 nm pore size). The  
120 membrane was changed after every 51 cycles to ensure that the membrane is not damaged. The odd  
121 number of extrusion cycle was used to collect the nanoemulsion from the second syringe so that the  
122 unextruded larger particles remained in the first syringe.

123 *Nanoemulsions with sodium cholate*

124 It is likely that nanoemulsions stabilized with phospholipids may contain liposomes. Therefore, detergents  
125 are used to solubilize lipid membranes [19] because at sufficient concentration, detergents such as  
126 sodium cholate solubilize the phospholipid to form mixed micelles (MMs). When the amount of detergent  
127 in the MMs is reduced further, the MMs enlarge to form liposomes [20, 21]. Thus, different concentrations  
128 (20 – 50 mM) of sodium cholate were used to solubilize the liposomes formed during the preparation of  
129 nanoemulsions. The concentration of sodium cholate influences the formation and solubilization of  
130 liposomes. The sodium cholate was added to the aqueous phase and the crude emulsion was prepared  
131 as described previously.

132 The detergent was removed by dialysis as in the preparation of unilamellar liposomes [22-24]. Sodium  
133 cholate was used in this study because it is non-toxic at low concentration and is easy to remove by  
134 dialysis [25].

#### 135 *Radiolabelling of nanoemulsions*

136 Nanoemulsions were either single- or double-labeled with radioactive cholate and phospholipid. Single  
137 labeling refers to the use of [<sup>3</sup>H]-labeled cholic acid and double labeling refers to the use of both [<sup>3</sup>H]-  
138 labeled cholic acid and [<sup>14</sup>C]-phosphatidylcholine. Single labeling was performed by an overnight  
139 incubation of [<sup>3</sup>H]-labeled cholic acid (55.5 kBq) with nanoemulsion. The resulting radiolabelled  
140 nanoemulsion was called hot nanoemulsion. For double labeling, [<sup>3</sup>H]-labeled cholic acid (55.5 kBq) was  
141 used in the aqueous phase and L- $\alpha$ -dipalmitoyl-[<sup>14</sup>C]-phosphatidylcholine (DPPC) (5.55 kBq) was used in  
142 the oil phase. Thus obtained hot crude emulsion was extruded as usual. The initial concentrations of  
143 sodium cholate and phospholipid were 30 mM and 15.75 mM, respectively.

#### 144 **Removal of sodium cholate by dialysis**

145 After extrusion, the detergent was removed via dialysis through a very high permeability membrane (10  
146 kDa cutoff). The nanoemulsion was dialyzed against a detergent free medium (glycerol, 2.5 % w/w) using  
147 an in-house built dialyzer (Fig 1) and a commercial dialyzer (Slide-A-Lyzer<sup>®</sup>).

#### 148 *Dialysis using in-house built dialyzer*

149 The dialyzer was developed at an institute of Albert Ludwig University of Freiburg, Germany. The  
150 membrane (very high permeability 10 kDa cutoff membrane, Dianorm GmbH, Munich, Germany) was  
151 equilibrated with the dialysis fluid (glycerol, 2.5 % w/w) for at least 30 min prior to use and fixed in  
152 between the two compartments of a dialysis cell (4.9 cm<sup>2</sup> cavity area) and the dialysis was performed as  
153 described elsewhere [26]. Briefly, a specified volume of nanoemulsion was placed in one compartment  
154 and the dialysis fluid was allowed to flow continuously through the other compartment. Both the  
155 compartments equipped with small magnetic stir bars were separated by the pre-equilibrated membrane.  
156 Any air bubbles in both the compartments were excluded to ensure enough osmotic pressure for

157 detergent removal. Failure to seal the compartments tightly might result into loss of sample due to  
158 leakage. The flow rate ( $2.5 \text{ mL} \cdot \text{min}^{-1}$ ) of dialysis fluid was regulated by using a pump (Ismatec SA, Zurich,  
159 Switzerland). The dialysis was performed at continuous stirring (700 rpm) for 28 h at room temperature.

### 160 ***Fig 1. In-house built dialyzer***

#### 161 *Dialysis using commercial dialyzer*

162 Dialysis was performed by using a commercial dialyzer (Slide-A-Lyzer<sup>®</sup>) available in different capacities  
163 (0.5 mL – 3.0 mL) and membrane cutoffs. The dialyzer cassette (1 mL) having a membrane cutoff of 10  
164 kDa was pre-equilibrated with the dialysis fluid (glycerol, 2.5 % w/w) for at least 30 min prior to dialysis.  
165 Nanoemulsion (1 mL) was pipetted into the cassette and a small magnetic stir bar was inserted into the  
166 cassette. Entrapped air was removed by lightly pressing the membrane and immediately closing the lid.  
167 Nanoemulsion was dialyzed against the fixed volume of dialysis fluid (500 ml) at constant stirring  
168 (300 rpm) for 28 h at room temperature.

#### 169 *Dialysis of radiolabelled nanoemulsions*

170 Efficiency of dialysis was investigated for radiolabeled nanoemulsions dialyzed using two types of  
171 dialyzers. The radioactivity [<sup>3</sup>H and/or <sup>14</sup>C] in nanoemulsions was analyzed by using liquid scintillation  
172 counter (LSC). As negative and positive controls, cold and hot nanoemulsions (before dialysis),  
173 respectively, were used. The negative control represented the background value, whereas, the positive  
174 control represented the reference value. For LSC measurement, the samples were withdrawn hourly,  
175 diluted with Ultima Gold<sup>®</sup> at a ratio of 1:6 and analyzed under LSC to detect the radioactivity. All the  
176 measurements were performed in triplicates.

### 177 **Characterization of nanoemulsion**

178 Nanoemulsions were characterized by measuring the particle size (Z-average), size distribution  
179 (polydispersity index, PDI) and the surface charge (zeta-potential) using a photon correlation  
180 spectroscopy (PCS, Malvern Nano ZS<sup>®</sup> series, Malvern, UK) which is based on Mie scattering theory [7].  
181 A monochromatic laser 633 nm, fixed at a scattering angle of 173° is used to measure the Brownian



182 motion of the particles which is correlated with the hydrodynamic diameter. Morphological  
183 characterization of nanoemulsions was performed by the help of cryo-transmission electron microscopic  
184 (cryo-TEM) pictures. The phospholipid content of the nanoemulsions was quantified by Bartlett assay  
185 [27]. Similarly, other parameters such as stability were also investigated.

#### 186 *Z-average and polydispersity index (PDI)*

187 The z-average (nm) and polydispersity index (PDI) which represent the hydrodynamic diameter and size  
188 distribution of a particle, respectively was calculated as an average value of 3 consecutive measurements  
189 each consisting of 15 sub-runs lasting 10 s per sub-run. For the measurement, samples were prepared in  
190 a small volume disposable cuvette by diluting 5  $\mu\text{L}$  nanoemulsion with 995  $\mu\text{L}$  particle free deionized  
191 water (1:200). Prior to dilution deionized water was filtered through a cellulose acetate filter (Minisart®,  
192 Sartorius Stedim Biotech GmbH, Goettingen, Germany, pore size 0.2  $\mu\text{m}$ ) to avoid the effects of multiple  
193 scattering from dust particles. During the measurement, an equilibration period of 80 s and temperature of  
194 25 °C were set up. The intensity average diameter and PDI of each sample was calculated from the  
195 Cumulant analysis (Zetasizer software 6.2) of each sample's correlation function. The PDI indicates the  
196 homogeneity of the particle size distribution. A PDI value below 0.1 is an indication for a narrow size  
197 distribution [28].

#### 198 *Zeta potential ( $\zeta$ )*

199 The zeta-potential ( $\zeta$ ) is a charge acquired by a particle or molecule in a given medium and is measured  
200 by laser Doppler anemometry (Malvern Nano ZS® series, Malvern, UK). Samples were diluted (1:200)  
201 similar to that for the particle size measurement and filled in a folded capillary cell. After an equilibration  
202 period of 120 s at 25 °C, measurements were performed in triplicate in an automatic mode so that the  
203 total sub-runs are between 10 and 100. Since the similar charges repel each other, the particles avoid  
204 phenomena such as flocculation and aggregation making the samples stable for longer period. Therefore,  
205 measurement of zeta-potential is an important parameter to study the stability of colloidal systems.  
206 Absolute values larger than  $\pm 30$  mV are considered as an indicator for a stable emulsion system [7].

## 207 **Cryo-transmission electron microscopy (Cryo-TEM)**

208 Cryo-TEM is a widely used method to morphologically characterize the colloidal particles such as  
209 liposomes [26] and nanoemulsions [29]. This advanced microscopic method captures the two  
210 dimensional image of the sample and gives accurate information about the size, lamellarity and size  
211 distribution. The images of nanoemulsions were taken using a LEO 912 OMEGA electron microscope  
212 (Zeiss, Oberkochen, Germany) operating at 120 kV and 'zero-loss' conditions. Approximately 5  $\mu\text{L}$  of  
213 sample (diluted if necessary) was placed on a copper grid (Quantifoil® S7/2 Cu 400 mesh, holey carbon  
214 films, Quantifoil Micro Tools GmbH, Jena, Germany) and any excess liquid was absorbed by a filter  
215 paper, so that only a thin (100 – 500 nm) liquid film remained on the copper grid [30]. The sample was  
216 then immediately shock-frozen by plunging it into liquid ethane. The vitrified sample was stored at 90 K  
217 (-183° C) in liquid nitrogen until it was loaded into a cryogenic sample holder (D626, Gatan Inc,  
218 Pleasanton, USA). The specimens were examined at -174 °C. Digital images were recorded with a slow  
219 scan CCD camera system (Proscan HSC 2 Oxford instruments, Abingdon, USA), and at a minimal  
220 under-focus of the microscope objective lens to provide sufficient phase contrast [31]. All the pictures  
221 were analysed using the software iTEM 5.0 Build 1054 (Soft Imaging System GmbH, Muenster,  
222 Germany). Various scales (2  $\mu\text{m}$ , 1  $\mu\text{m}$ , 500 nm, 200 nm, 100 nm) could be used to estimate the size of  
223 individual particle.

## 224 **Determination of phospholipid content**

225 Phospholipid used in the preparation was quantified by performing phosphorous assay. This assay  
226 measures the phosphorous present in the head region of phospholipid as a phosphate molecule. The  
227 assay was performed according to the previously established method with some modifications [27]. The  
228 principle behind this assay is that one phosphorous atom corresponds to one phospholipid molecule.

229 The complete assay was conducted in phosphate free glass tubes. For a calibration curve, a standard  
230 solution of  $\text{KH}_2\text{PO}_4$  (1 mM) in HCl (0.05 N) was prepared and the volumes of 50  $\mu\text{L}$ , 100  $\mu\text{L}$ , 150  $\mu\text{L}$ , 200  
231  $\mu\text{L}$ , 250  $\mu\text{L}$ , 300  $\mu\text{L}$  and 350  $\mu\text{L}$  were weighed in glass tubes on the assumption of Lambert-Beer law that  
232 absorbance is linear with concentration. Similarly, the sample volume was calculated from the theoretical

233 concentration so that the phosphate content falls within the calibration curve. An empty glass tube  
234 (without standard solution) was used as blank value and treated in a similar manner as calibration and  
235 sample tubes. Then 500  $\mu\text{L}$  of  $\text{H}_2\text{SO}_4$  (10 N) were added to all the tubes including the blank tube and  
236 mixed well by vortexing and incubated at 160  $^\circ\text{C}$  for 3 h. After 3 h, the samples appeared dark brown in  
237 color due to oxidation. In order to completely oxidize the organic compounds, 200  $\mu\text{L}$  of  $\text{H}_2\text{O}_2$  (30 % w/w)  
238 was added, vortexed and incubated further at 160  $^\circ\text{C}$  for 1.5 h. Upon complete incubation, the solution in  
239 the tubes should turn clear. If this was not the case, incubation at 160  $^\circ\text{C}$  for 1.5 h was repeated with  
240 additional 200  $\mu\text{L}$  of  $\text{H}_2\text{O}_2$  (30 % w/w). Clear solutions marked complete oxidation and were ready for  
241 reduction process.

242 Then 4.75 mL of ammonium molybdate solution (0.22 % w/v) and 200  $\mu\text{L}$  of freshly prepared Fiske  
243 Subbarrow reducer solution (14.8 % w/v) were added. After each addition of reagents, the contents of the  
244 glass tubes were mixed properly by vortexing. Then the tubes were covered with glass marbles and  
245 incubated for another 10 min at 95  $^\circ\text{C}$  in a heating block (MTB 250, Development and Technology,  
246 Ilmenau, Germany). After the incubation, the tubes were cooled down and vortexed. The solutions were  
247 transferred to a 2 mL disposable plastic cuvette and absorbance was measured using a  
248 spectrophotometer at a wavelength of 833 nm (Lambda XLS, Perkin Elmer, Hamburg, Germany). The  
249 blank value was deducted from the standard solutions and a calibration curve was prepared by plotting  
250 absorbance against the amount of phospholipid (micromoles). Using the slope of a straight line, the  
251 phospholipid concentration of the sample was calculated. The acceptable regression value of calibration  
252 curve was greater than 0.99.

### 253 **Stability studies**

254 Nanoemulsions were stored under refrigeration for as long as 7 months. The particle size, PDI and zeta-  
255 potential were measured every month and compared with the initial value (day of preparation). Any  
256 significant increase in the above mentioned parameters was considered to be an unstable preparation. In  
257 addition, any phase separation if observed during the storage period was noted and concluded to fail the  
258 stability study.

## 259 Results and discussion

### 260 Characterization of nanoemulsion

#### 261 *Hand extruded nanoemulsions*

262 The z-average of nanoemulsions after four sets of extrusion (51x400 nm and 153x200 nm membranes)  
263 was measured and the results are presented in Table 2. The z-average was found to be about 235 nm  
264 with PDI of about 0.135 after the first set of extrusion. Further extrusion through 200 nm membrane  
265 resulted in a sharp reduction in droplet size to about 185 nm with PDI below 0.09. Similarly, after the four  
266 sets of extrusion, the particle size reduced to about 166 nm and the PDI value was much lower (about  
267 0.05). The size of emulsion droplet is smaller than the pore size of membrane (200 nm) because the  
268 droplets break down into droplet size closer to the pore size of the membrane [32]. Thus, it was observed  
269 that the reduction in droplet size can be improved by increasing the number of extrusion cycles. In case of  
270 liposomes, extrusion could reduce the vesicles to be in the size range between 50 and 100 nm when  
271 extruded through 100 nm pore size membranes [33]. However, the use of 100 nm membrane was not  
272 able to reduce the emulsion droplet below 100 nm probably due to the oily inner core (data not shown).  
273 The PDI value between 0.04 and 0.08 is defined to be extremely highly mono-disperse [28]. Therefore,  
274 the resulting nanoemulsion could also be considered as extremely mono-disperse nanoemulsions.

275 **Table 2. Characteristics of nanoemulsions after subsequent sets of extrusion cycles**

| Extrusion cycles | Z-average (nm) | Poly Dispersity Index (PDI) | Zeta-Potential (mV) |
|------------------|----------------|-----------------------------|---------------------|
| 51 x 400 nm      | 234.7 ± 2.69   | 0.135 ± 0.014               | -22.5 ± 0.351       |
| 51 x 200 nm      | 185.1 ± 0.60   | 0.091 ± 0.034               | -24.1 ± 0.265       |
| 102 x 200 nm     | 174.4 ± 0.70   | 0.063 ± 0.003               | -20.7 ± 0.361       |
| 153 x 200 nm     | 166.2 ± 1.01   | 0.048 ± 0.007               | -21.4 ± 0.635       |

276 Results are represented as mean values ± SD (n=3).

277 The zeta-potential of the emulsions during the various extrusion steps was found to be between -20 and  
278 -25 mV (Table 2). According to Hippalgaonkar and group, the obtained nanoemulsions are not  
279 electrostatically stable as the zeta-potential is below ± 30 mV [7]. It was also observed that the zeta-  
280 potential was not affected by increasing the extrusion cycle.

281 *Nanoemulsions with sodium cholate*

282 Since the sodium cholate was used only to disorganize the liposomal membrane [19], it was removed  
 283 after extrusion by dialysis against detergent-free aqueous medium [25, 26]. Sodium cholate at various  
 284 concentrations (20 – 50 mM) was studied for optimizing the appropriate concentration of sodium cholate  
 285 to increase the number of nanoemulsions and reduce the number of liposomes. It was observed that the  
 286 particle size changed minimally with an increase in sodium cholate concentration (Table 3).

287 **Table 3. Characteristics of nanoemulsions with different concentrations of sodium cholate**

| Sodium<br>Cholate<br>(mM) | Z-average (nm) |              | Poly Dispersity Index<br>(PDI) |               | Zeta-Potential (mV) |              |
|---------------------------|----------------|--------------|--------------------------------|---------------|---------------------|--------------|
|                           | Before         | After        | Before                         | After         | Before              | After        |
|                           | Dialysis       | Dialysis     | Dialysis                       | Dialysis      | Dialysis            | Dialysis     |
| 20                        | 161.6 ± 1.44   | 160.8 ± 2.69 | 0.079 ± 0.025                  | 0.072 ± 0.018 | -45.4 ± 6.11        | -35.8 ± 16.7 |
| 30                        | 168.6 ± 10.32  | 165.9 ± 8.90 | 0.050 ± 0.006                  | 0.056 ± 0.004 | -47.3 ± 2.57        | -37.8 ± 6.7  |
| 40                        | 165.9 ± 11.66  | 166.1 ± 9.12 | 0.023 ± 0.017                  | 0.069 ± 0.005 | -47.9 ± 7.95        | -36.1 ± 4.6  |
| 50                        | 168.9 ± 12.05  | NA           | 0.043 ± 0.001                  | NA            | -44.4 ± 3.03        | NA           |

288 Extrusion cycles: 51x400 nm and 153x200 nm, Results are represented as mean values ± SD (n=3). NA: Not  
 289 available.

290 However, the PDI value was found to remain below 0.1 at all concentrations of sodium cholate. After  
 291 complete extrusion (51x400 nm and 153x200 nm), the size of nanoemulsions was found to be below 170  
 292 nm at all concentrations of sodium cholate which is comparable to the size of nanoemulsions without  
 293 sodium cholate (Table 2). Additionally, dialysis seemed to have negligible effect on particle size and PDI  
 294 of nanoemulsions. Thus, the findings suggest that all the studied concentration of sodium cholate (20 –  
 295 50 mM) can be used to prepare homogenous nanoemulsions without affecting the Z-average and PDI  
 296 values.

297 Similarly, an increase in sodium cholate concentration did not increase the zeta-potential of  
 298 nanoemulsions (Table 3). The zeta-potential was found to be in the range of -45 mV to -48 mV when  
 299 sodium cholate was used at different concentrations (Table 3) which is an increment of about -20 mV  
 300 when compared to that of nanoemulsions without sodium cholate (Table 2). Nevertheless, after dialysis  
 301 the zeta-potential was reduced to about -36 mV which accounts to a loss of about -10 mV. Since the

302 values were above -30 mV, the nanoemulsions were stable electrostatically. It was observed that the use  
303 of sodium cholate provided additional electrostatic stability to the nanoemulsion even after its removal via  
304 dialysis. Therefore, the use of sodium cholate at higher concentration (50 mM) does not seem to be  
305 beneficial.

### 306 **Removal of sodium cholate by dialysis**

307 Two types of dialyzers were used to compare their detergent removal performance and the results are  
308 shown in Table 4.

309 **Table 4. Comparison of dialyzers**

| Dialyzers         | Z-average (nm)  |                | Poly Dispersity Index (PDI) |                | Zeta-Potential (mV) |                |
|-------------------|-----------------|----------------|-----------------------------|----------------|---------------------|----------------|
|                   | Before Dialysis | After Dialysis | Before Dialysis             | After Dialysis | Before Dialysis     | After Dialysis |
| In-house dialyzer | 164.5 ± 7.31    | 165.1 ± 9.11   | 0.039 ± 0.006               | 0.058 ± 0.022  | -50.4 ± 4.15        | -43.5 ± 1.48   |
| Slide-A-Lyzer®    | 165.5 ± 7.59    | 164.3 ± 7.96   | 0.049 ± 0.013               | 0.062 ± 0.006  | -49.47 ± 4.80       | -40.37 ± 2.39  |

310 Extrusion cycles: 51x400 nm and 153x200 nm, Sodium cholate concentration: 30 mM. Results are represented as  
311 mean values ± SD (n=3).

312 The concentration of sodium cholate was maintained at 30 mM. It was observed that the nanoemulsions  
313 before and after the dialysis were similar in size and homogeneity in both dialyzers. But the zeta-potential  
314 after dialysis using the Slide-A-Lyzer® was found to be slightly lower than the in-house built dialyzer.  
315 However, the nanoemulsions were stable with zeta-potential above -30 mV in both the cases. These  
316 findings showed that the two dialyzers showed similar performance and are easily replaceable as per the  
317 convenience and availability.

### 318 *Sodium cholate removal efficiency*

319 Sodium cholate removal efficiency was investigated using the two types of dialyzers and the results are  
320 shown in Fig 2.

### 321 **Fig 2. Sodium cholate removal efficiency in radiolabelled nanoemulsions (single labeling)**

322 Labeling: Incubation of cold nanoemulsion with [<sup>3</sup>H]-labelled cholic acid (55.5 kBq). Sodium cholate: 30 mM. Results  
323 are normalized with a dilution factor calculated after dialysis. Error bars represent SD (n=3).

324 The study illustrated that sodium cholate removal profile differed slightly in the early phase but overlapped  
325 with each other in the later phase, showing similar pattern of detergent removal in both the dialyzers.  
326 Within the first hour of dialysis only about 16 % of cholate was removed by the Slide-A-Lyzer<sup>®</sup> whereas  
327 already 58 % was removed by the in-house dialyzer. However, after 7 hours of dialysis, both the dialyzers  
328 exhibited similar efficiency (detergent removal of about 85 %). After the completion of dialysis period of  
329 28 h, the residual cholate for both dialyzers was found to be between 3 and 5 % when the molar ratio of  
330 phospholipid-to-detergent was 0.525 (15.75 mM phospholipid and 30 mM sodium cholate). In a previous  
331 study, the residual cholate was measured to be less than 0.5% after 24 h of dialysis when the molar ratio  
332 of phosphatidylcholine-to-cholate was maintained at 0.625 [28]. This explains that the amount of residual  
333 detergent depends upon the phospholipid-to-detergent ratio used.

334 Similarly, in double labeling [<sup>3</sup>H and <sup>14</sup>C] study, along with the sodium cholate depletion, phospholipid  
335 content was also analyzed to monitor the loss of phospholipid during dialysis. Radiolabelled  
336 nanoemulsion was dialyzed using Slide-A-Lyzer<sup>®</sup>. The samples were analyzed hourly for <sup>3</sup>H and <sup>14</sup>C  
337 under LSC and the results are summarised in Fig 3. It was observed that about 65 % of sodium cholate  
338 was removed within 2 h, whereas, after 28 h of dialysis, about 7 % of sodium cholate remained in  
339 nanoemulsion (Fig 3A). This value was slightly higher than the amount obtained in the previous study  
340 where labeling was performed by incubating cold nanoemulsion with [<sup>3</sup>H]-labelled cholic acid (Fig 2, Slide-  
341 A-Lyzer<sup>®</sup>). This study thus showed that the method of radiolabeling affects the sodium cholate removal  
342 profile. The ratio <sup>3</sup>H/<sup>14</sup>C was about one which means that almost an equal proportion of <sup>3</sup>H and <sup>14</sup>C  
343 remained in the nanoemulsion after dialysis (Fig 3B).

344 **Fig 3. Analysis profile of nanoemulsion dialyzed using Slide-A-Lyzer<sup>®</sup> (double labeled)**

345 **A) <sup>3</sup>H and <sup>14</sup>C (Radioactivity %); B) Ratio of <sup>3</sup>H and <sup>14</sup>C (<sup>3</sup>H/<sup>14</sup>C)**

346 Labeling: Extrusion of hot crude emulsion containing [<sup>3</sup>H]-labelled cholic acid (55.5 kBq) and [<sup>14</sup>C]-  
347 Phosphatidylcholine (5.55 kBq). Sodium cholate: 30 mM. Results are normalized with a dilution factor calculated after  
348 dialysis. Results are represented as mean values. Error bars represent SD (n=3).

## 349 **Cryo-transmission electron microscopy (Cryo-TEM)**

350 The cryo-TEM pictures were not only essential to observe the presence of liposomes but also to find out  
351 the appropriate concentration of sodium cholate required to prepare homogenous and stable  
352 nanoemulsions. The Cryo-TEM pictures of nanoemulsions at different conditions are shown in Fig 4.

353 ***Fig 4. Cryo-TEM pictures of nanoemulsions at different conditions.***

354 ***A) Without sodium cholate; B) 20 mM sodium cholate after dialysis; C) 30 mM sodium cholate***  
355 ***after dialysis; D) 40 mM sodium cholate after dialysis; E) 30 mM sodium cholate before dialysis; F)***  
356 ***30 mM sodium cholate after dialysis and after 23 weeks of storage under refrigeration.***

357 Extrusion cycles: 51x400 nm and 153x200 nm. Dialyzer: in-house dialyzer.

358 It was surprisingly observed that very few nanoemulsion droplets (dark circular structures) and many  
359 liposomes (transparent circular structures) were present when sodium cholate was not used in the  
360 preparation of nanoemulsions (Fig 4A). In cryo-TEM images, liposomes appeared as transparent circular  
361 structures due to their aqueous interior and the dark border represents the phospholipid bilayer [26],  
362 whereas, nanoemulsions appeared as dark circular structures due to their oily inner core. According to  
363 Torchilin and Weissig, liposomes are formed spontaneously upon rehydration of phospholipids [34, 35].  
364 Therefore, the phospholipid used as emulsifying agent in the preparation of nanoemulsions could also  
365 form liposomes. Previously, nanoemulsions and solid lipid nanoparticles were prepared by using  
366 extrusion method but without the use of sodium cholate. Also, the simultaneous formation of liposomes  
367 was not mentioned earlier [36]. Our findings suggest that cryo-TEM pictures are necessary in complete  
368 characterization of nanoemulsions. If cryo-TEM pictures are not taken, the presence of liposomes along  
369 with nanoemulsions could not be identified. From Table 3, it was difficult to find out the optimum  
370 concentration of sodium cholate to prepare homogenous and stable nanoemulsions which are free from  
371 liposomes because at all concentrations of sodium cholate, nanoemulsions were found to be  
372 homogeneous and stable on the basis of PDI and zeta-potential values. Therefore, cryo-TEM pictures of  
373 nanoemulsions were supportive to find out the optimum concentration of sodium cholate.



374 Fig 4 revealed that after dialysis, liposomes of about 200 nm (marked with white arrows) were present at  
375 sodium cholate concentration of 20 mM (Fig 4B), but at 30 mM, no such liposomes were detected (Fig  
376 4C). As the concentration of sodium cholate was increased further to 40 mM, numerous but very small  
377 liposomes (marked with white boundaries) were observed again (Fig 4D). At 20 mM, the sodium cholate  
378 was perhaps adequate to solubilize the lipid membrane and reorganise them to form liposomes upon  
379 dialysis. But at 30 and 40 mM, the ratio of detergent-to-phospholipid was perhaps inadequate to form  
380 liposomes having defined size. In a previous study, the critical molar ratio of detergent-to-lipid for the  
381 formation of liposomes by detergent removal via dialysis was found to be between 1.2 and 2 with lipid up  
382 to 25 mM [20, 28]. With the help of cryo-TEM pictures, it was thus concluded that the appropriate  
383 concentration of sodium cholate to prepare nanoemulsions without liposomes was 30 mM.

384 The cryo-TEM picture of nanoemulsion before (Fig 4E) and after dialysis (Fig 4C) seem to be similar  
385 indicating no influence of dialysis on the size of nanoemulsion and the results were also supported by  
386 Table 3 and Table 4. Additionally, Fig 4C and Fig 4F do not seem to differ much which means that the  
387 nanoemulsion was stable for as long as 23 weeks when stored under refrigeration.

### 388 **Determination of phospholipid content**

389 Phospholipid content of nanoemulsions prepared using 30 mM sodium cholate was quantified before and  
390 after dialysis by means of phosphorous assay. With 1.2 % (w/w) of phospholipid (E80®), the initial  
391 concentration was theoretically calculated to be 15.75 mM. After phosphorous assay, the phospholipid  
392 content was found to differ slightly (Table 5).

393 **Table 5. Phosphorous assay of nanoemulsions**

| Type of dialyzer        | Phospholipid content (mM) |                |
|-------------------------|---------------------------|----------------|
|                         | Before dialysis           | After dialysis |
| In-house built dialyzer | 14.9 ± 2.38               | 11.73 ± 1.38   |
| Slide-A-Lyzer®          | 14.54 ± 0.92              | 14.11 ± 1.62   |

394 Composition: Table 1 (with 30 mM sodium cholate). Dialysis: against aqueous glycerol (2.5 %, w/w). Results are  
395 normalized with a dilution factor calculated after dialysis and are represented as mean values ± SD (n=3).

396 It was observed that phospholipid was lost during dialysis. Among the two types of dialyzers, the loss was  
397 found to be higher in in-house dialyzer (21 %) than in Slide-A-Lyzer® (3 %). The variation in loss of  
398 phospholipid in both dialyzers could be explained by the variation in dialysis conditions such as volume  
399 and flow rate of dialysis fluid. The dialysis process in in-house dialyzer was an open-system where the  
400 dialysis fluid (about 4.5 L) was allowed to flow continuously at a fixed flow rate (2.5 mL min<sup>-1</sup>) for a fixed  
401 period of time (28 h) whereas, dialysis using Slide-A-Lyzer® was a closed-system where a fixed volume of  
402 dialysis fluid (500 mL) at constant stirring (300 rpm) was used and the dialysis for continued for 28 h at  
403 room temperature. From this, it is clear that the volume of dialysis fluid affects the loss of phospholipid but  
404 does not affect the characteristics of nanoemulsions.

405 In spite of the loss of phospholipid during dialysis (Table 5), the cryo-TEM images revealed that the  
406 nanoemulsions were still stable even after storage under refrigeration for as long as 23 weeks (Fig 4 F)  
407 when compared to the cryo-TEM images before dialysis (Fig 4 E) and after dialysis (Fig 4 C).

#### 408 **Stability studies**

409 The stability of nanoemulsions dialyzed by using two different dialyzers was studied for a duration of 7  
410 months. Since the measurement of particle size, PDI and zeta-potential and Cryo-TEM images are useful  
411 techniques to confirm the stability of nanoemulsions [37], the samples were monitored every month for  
412 particle size, PDI and zeta-potential. Three samples per dialysis method were stored under refrigeration  
413 (4 – 8 °C) and studied for their stability. Fig 5 represents the summary of stability of nanoemulsions  
414 dialyzed using in-house built dialyzer.

#### 415 ***Fig 5. Stability of nanoemulsions dialyzed using in-house built dialyzer***

416 It was observed, that the changes in size during the storage period was negligible. The PDI values were  
417 found to change with time but remained below 0.1 even after 7 months of storage. A slight fluctuation was  
418 noted in zeta-potential for all samples. Nevertheless, zeta-potential was measured to be above -30 mV for  
419 all samples even after 7 months. Therefore, the samples were concluded to be stable under refrigeration  
420 for as long as 7 months.

421 Similarly, the stability of nanoemulsions dialyzed using Slide-A-Lyzer<sup>®</sup> is summarized in Fig 6. As shown  
422 in figure, the changes in both size and PDI were observed to be negligible like in the case of in-house  
423 built dialyzer (Fig 5). The zeta-potential throughout the storage period was measured to be above -30 mV.  
424 Due to all these reasons, the samples were found to be stable for about 7 months. Therefore, both  
425 dialyzers were found to be suitable for preparing nanoemulsions without liposomes which are stable for  
426 as long as 7 months under refrigeration. Thus, both the dialyzers are conveniently replaceable to each  
427 other.

428 ***Fig 6. Stability of nanoemulsions dialyzed using Slide-A-Lyzer<sup>®</sup>***

## 429 **Conclusions**

430 Preparation of homogenous nanoemulsions in small-scale is a challenge, especially if the emulsion is  
431 stabilized by phospholipids due to the unavoidable formation of liposomes along with the emulsion  
432 droplets. Extensive extrusion of crude emulsion through polycarbonate membranes (51x 400 nm and  
433 153x 200 nm) at 65 °C not only reduced the emulsion droplet to nanometer range and but also prepared  
434 homogenous droplets as depicted by a PDI value below 0.1. Furthermore, the study showed that the use  
435 of a physiological detergent, sodium cholate at 30 mM concentration and later removal via dialysis after  
436 extrusion minimized the formation of liposomes resulting into nanoemulsions which are stable under  
437 refrigeration for as long as seven months. The cryo-TEM pictures provided sufficient evidences that the  
438 use of sodium cholate was indeed beneficial to prepare liposome-free nanoemulsions in small scale (less  
439 than 1 mL). The easy availability of commercial dialyzers at variable capacities makes the preparation  
440 process even easier.

441 Thus, this method could be regarded as an economic and yet promising technique especially for  
442 preparing functionalized or modified nanoemulsions where expensive ligands or antibodies, fluorescence  
443 or radioactive markers must be used to target such nanoemulsions to a specific cell or location.

## 444 **Acknowledgements**

445 The authors are thankful to DAAD for providing scholarship to conduct this project and Lipoid for the  
446 generous gift of phospholipid.

## 447 **Author contributions**

448 Conceived and designed the experiments: SG and RS. Performed the experiments: SG and SB.  
449 Analyzed the data: SG, MZ and RS. Contributed reagents/materials/analysis tools: SG, MZ and SB.  
450 Wrote the paper: SG, MZ, SB and RS.

## 451 **References**

- 452 1. Morales D, Gutierrez J, Garcia-Celma M, Solans Y. A study of the relation between bicontinuous  
453 microemulsions and oil/water nano-emulsion formation. *Langmuir*. 2003;19(18):7196-200.
- 454 2. Elaasser MS, Lack CD, Vanderhoff JW, Fowkes FM. The miniemulsification process - different form  
455 of spontaneous emulsification. *Colloids and Surfaces*. 1988;29(1):103-18.
- 456 3. Benita S, Levy MY. Submicron emulsions as colloidal drug carriers for intravenous administration -  
457 comprehensive physicochemical characterization. *J Pharm Sci*. 1993;82(11):1069-79.
- 458 4. Forgiarini A, Esquena J, Gonzalez C, Solans C. Formation of nano-emulsions by low-energy  
459 emulsification methods at constant temperature. *Langmuir*. 2001;17(7):2076-83.
- 460 5. Tadros T, Izquierdo R, Esquena J, Solans C. Formation and stability of nano-emulsions.  
461 *Adv Colloid Interface Sci*. 2004;108-09:303-18.
- 462 6. Bouchemal K, Briancon S, Perrier E, Fessi H. Nano-emulsion formulation using spontaneous  
463 emulsification: solvent, oil and surfactant optimisation. *Int J Pharm*. 2004;280(1-2):241-51.
- 464 7. Hippalgaonkar K, Majumdar S, Kansara V. Injectable lipid emulsions-Advancements, opportunities  
465 and challenges. *Aaps Pharmscitech*. 2010;11(4):1526-40.
- 466 8. Anton N, Vandamme TF. Nano-emulsions and micro-emulsions: Clarifications of the critical  
467 differences. *Pharm Res*. 2011;28(5):978-85.
- 468 9. Pouton CW. Formulation of self-emulsifying drug delivery systems. *Adv Drug Deliv Rev*.  
469 1997;25(1):47-58.
- 470 10. Tadros TF. *Emulsion formation, stability and rheology*. First ed: Wiley-VCH Verlag GmbH and Co.;  
471 2013.
- 472 11. Wooster TJ, Golding M, Sanguansri P. Impact of oil type on nanoemulsion formation and Ostwald  
473 ripening stability. *Langmuir*. 2008;24(22):12758-65.
- 474 12. Tadros T. Principles of emulsion stabilization with special reference to polymeric surfactants. *J*  
475 *Cosmet Sci*. 2004;55(4):406-7.
- 476 13. Washington C. Stability of lipid emulsions for drug delivery. *Adv Drug Deliv Rev*. 1996;20(2-3):131-  
477 45.
- 478 14. Sajjadi S. Nanoemulsion formation by phase inversion emulsification: On the nature of inversion.  
479 *Langmuir*. 2006;22(13):5597-603.
- 480 15. Liu W, Sun D, Li C, Liu Q, Xu H. Formation and stability of paraffin oil-in-water nano-emulsions  
481 prepared by the emulsion inversion point method. *J Colloid Interface Sci*. 2006;303(2):557-63.
- 482 16. Meleson K, Graves S, Mason T. Formation of concentrated nanoemulsions by extreme shear.  
483 *Soft Mater*. 2004;2(2-3):109-23.
- 484 17. Asua JM. Miniemulsion polymerization. *Prog Polym Sci*. 2002;27(7):1283-346.

- 485 18. Nakabayashi K, Amemiya F, Fuchigami T, Machida K, Takeda S, Tamamitsu K, et al. Highly clear  
486 and transparent nanoemulsion preparation under surfactant-free conditions using tandem acoustic  
487 emulsification. *Chem Commun (Camb)*. 2011;47(20):5765-7.
- 488 19. Helenius A, Simons K. Solubilization of membranes by detergents. *Biochim Biophys Acta*.  
489 1975;415(1):29-79.
- 490 20. Schubert R. Liposome preparation by detergent removal. *Liposomes, Methods Enzymol*.  
491 2003;367:46-70.
- 492 21. Lichtenberg D. Characterization of the solubilization of lipid bilayers by surfactants. *Biochim Biophys*  
493 *Acta*. 1985;821(3):470-8.
- 494 22. Brunner J, Skrabal P, Hauser H. Single bilayer vesicles prepared without sonication physicochemical  
495 properties. *Biochim Biophys Acta*. 1976;455(2):322-31.
- 496 23. Brunner J, Hauser H, Semenza G. Single bilayer lipid-protein vesicles formed from  
497 phosphatidylcholine and small intestinal sucrase.isomaltase. *J Biol Chem*. 1978;253(20):7538-46.
- 498 24. Kramer RM, Hasselbach HJ, Semenza G. Rapid transmembrane movement of phosphatidylcholine  
499 in small unilamellar lipid vesicles formed by detergent removal. *Biochim Biophys Acta*.  
500 1981;643(1):233-42.
- 501 25. Ollivon M, Lesieur S, Grabielle-Madelmont C, Paternostre M. Vesicle reconstitution from lipid-  
502 detergent mixed micelles. *BBA-Biomembranes*. 2000;1508(1-2):34-50.
- 503 26. Holzer M, Barnert S, Momm J, Schubert R. Preparative size exclusion chromatography combined  
504 with detergent removal as a versatile tool to prepare unilamellar and spherical liposomes of highly  
505 uniform size distribution. *J Chromatogr A*. 2009;1216(31):5838-48.
- 506 27. Bartlett GR. Phosphorus assay in column chromatography. *J Biol Chem*. 1959;234(3):466-8.
- 507 28. Milsmann MHW, Schwendener RA, Weder HG. Preparation of large single bilayer liposomes by a  
508 fast and controlled dialysis. *Biochim Biophys Acta*. 1978;512(1):147-55.
- 509 29. Mayenfels F. PhD Thesis. Fluorcarbonhaltige Nanoemulsionen zur Anwendung in der<sup>1</sup>H/<sup>19</sup>F-  
510 Magnetresonanztomographie: Albert Ludwig University of Freiburg, Germany; 2012.
- 511 30. Dubochet J, Adrian M, Chang JJ, Homo JC, Lepault J, McDowell AW, Schultz P. Cryo-electron  
512 microscopy of vitrified specimens. *Quarterly reviews of biophysics*. 1988;21(2):129-228.
- 513 31. Talmon Y. Transmission electron microscopy of complex fluids: The state of the art. *Berichte Der*  
514 *Bunsen-Gesellschaft-Physical Chemistry Chemical Physics*. 1996;100(3):364-72.
- 515 32. Patty PJ, Frisken BJ. The pressure-dependence of the size of extruded vesicles. *Biophys J*.  
516 2003;85(2):996-1004.
- 517 33. Olson F, Hunt CA, Szoka FC, Vail WJ, Papahadjopoulos D. Preparation of liposomes of defined size  
518 distribution by extrusion through polycarbonate membranes. *Biochim Biophys Acta*. 1979;557(1):9-  
519 23.
- 520 34. Torchilin VP, Weissig V. *Liposomes. Practical Approach*. Second ed. Oxford: Oxford  
521 University Press; 2003.
- 522 35. Torchilin V. PEGylated Pharmaceutical Nanocarriers. In: Wright JC, Burgess DJ, editors. *Long*  
523 *Acting Injections and Implants. Advances in Delivery Science and Technology*. 2012. p. 263-93.
- 524 36. Joseph S, Bunjes H. Preparation of Nanoemulsions and Solid Lipid Nanoparticles by Premix  
525 Membrane Emulsification. *J Pharm Sci*. 2012;101(7): 2479-89.
- 526 37. Grapentin C, Barnert S, Schubert R. Monitoring the stability of perfluorocarbon nanoemulsions by  
527 Cryo-TEM image analysis and dynamic light scattering. *PLoS ONE*. 2015;10(6):e0130674.
